# Supplementary material for: p120 Catenin Suppresses Basal Epithelial Cell Extrusion in Invasive Pancreatic Neoplasia
Source: Oxford University Press journal article supplement (doi:10.1158/0008-5472.can-15-2268), 2016-04-01

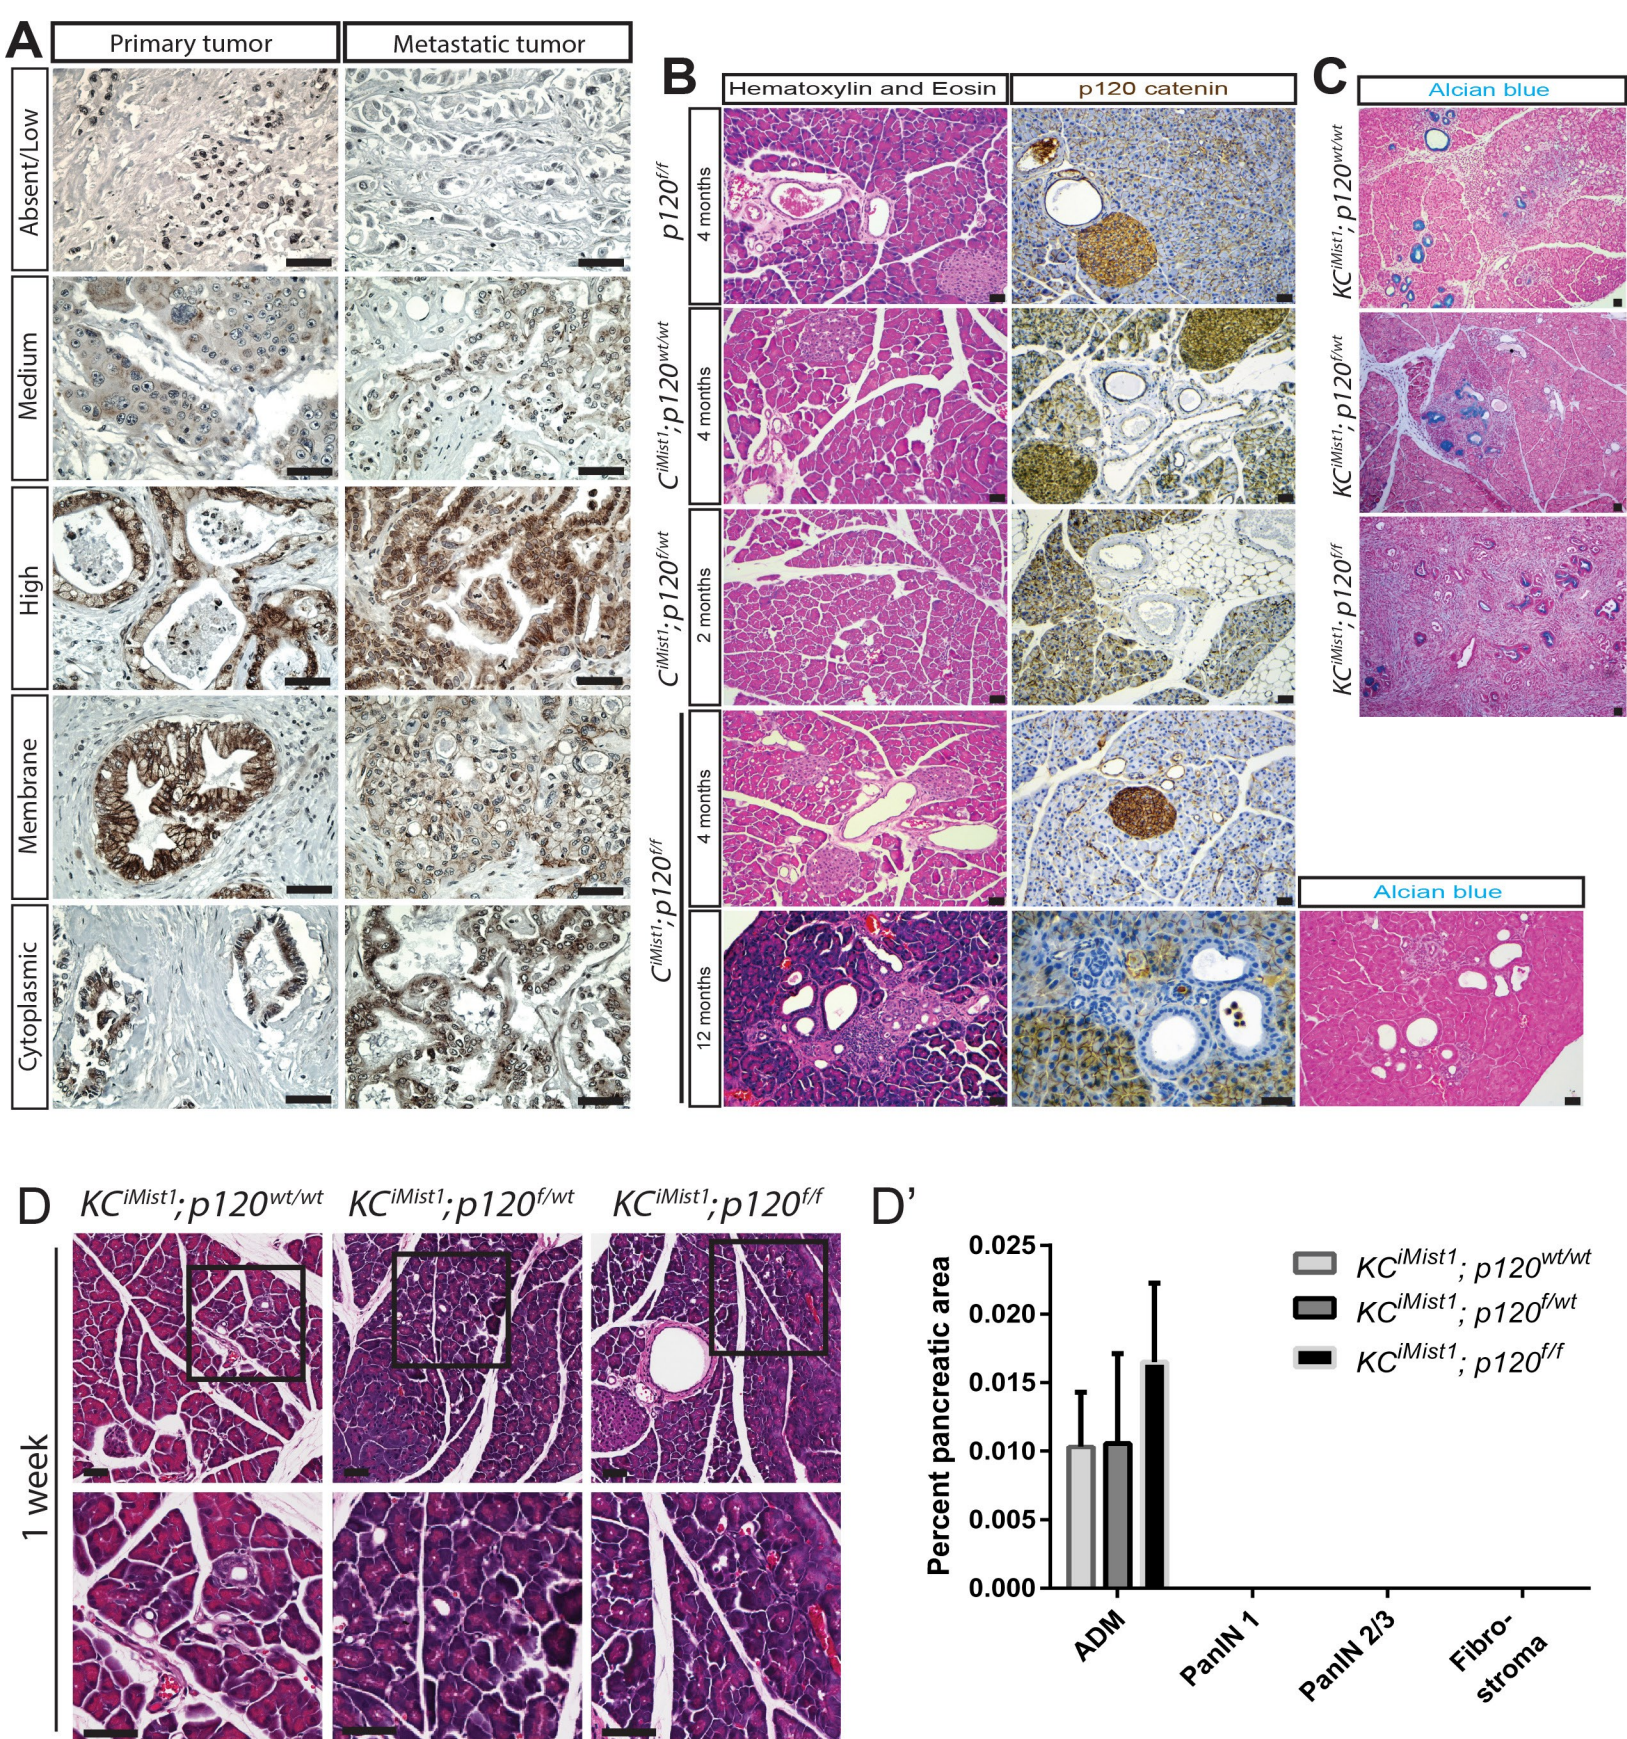



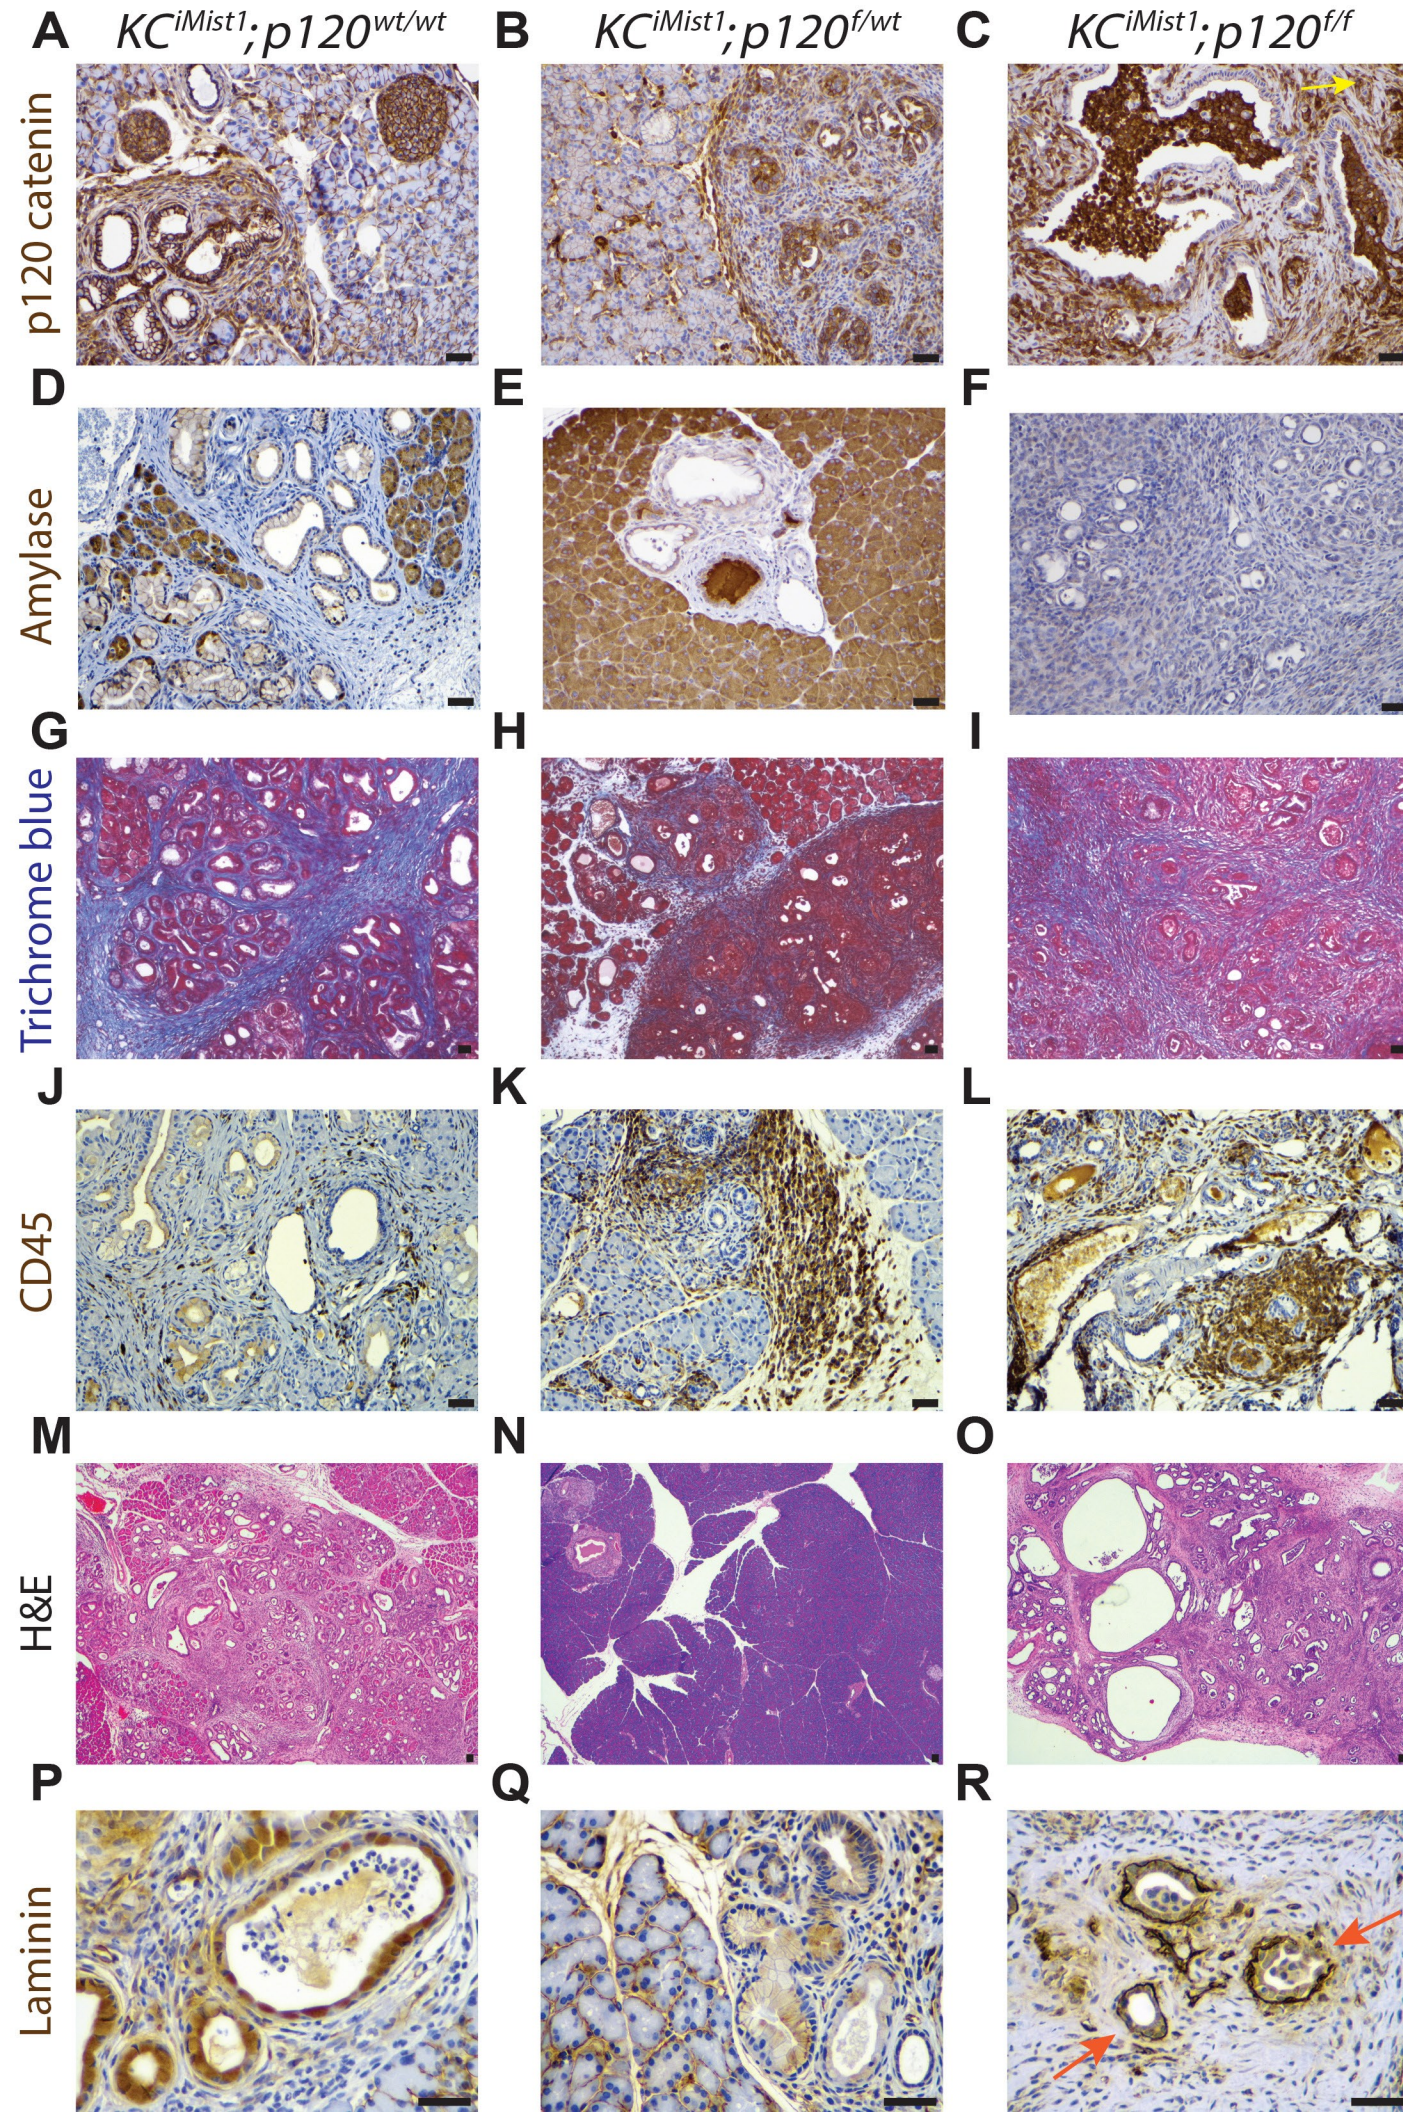



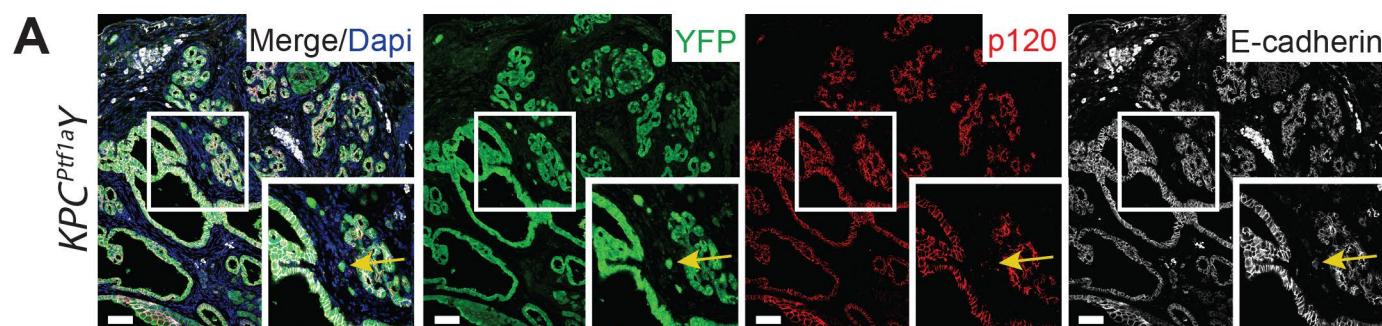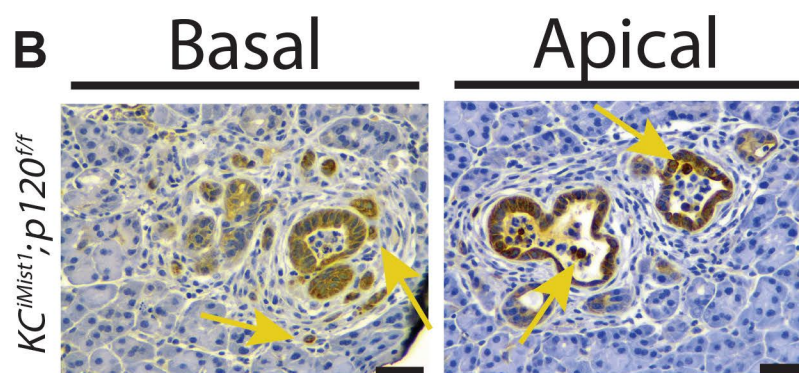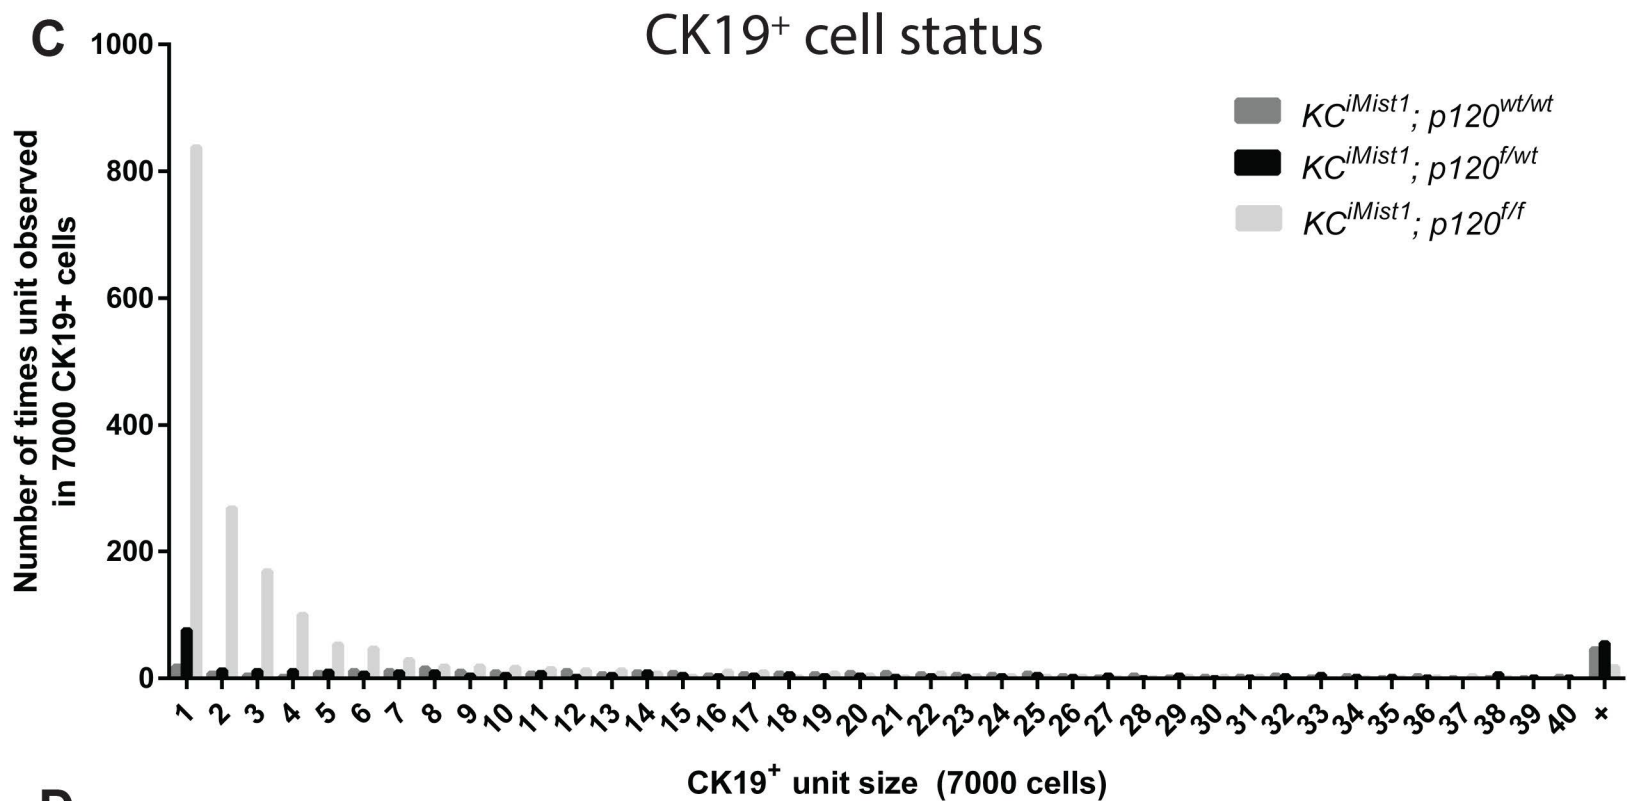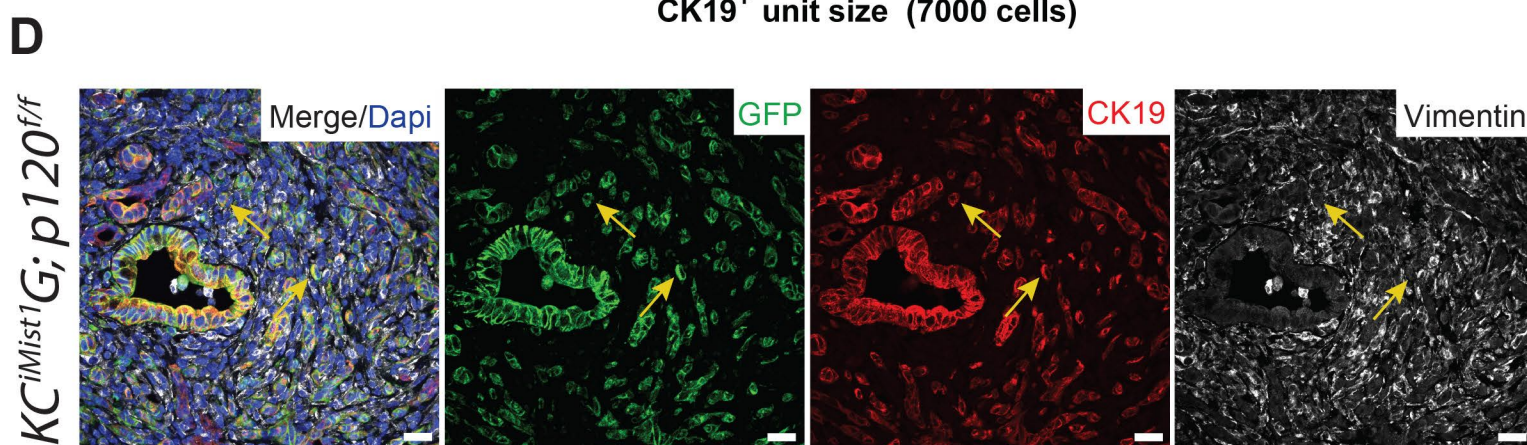



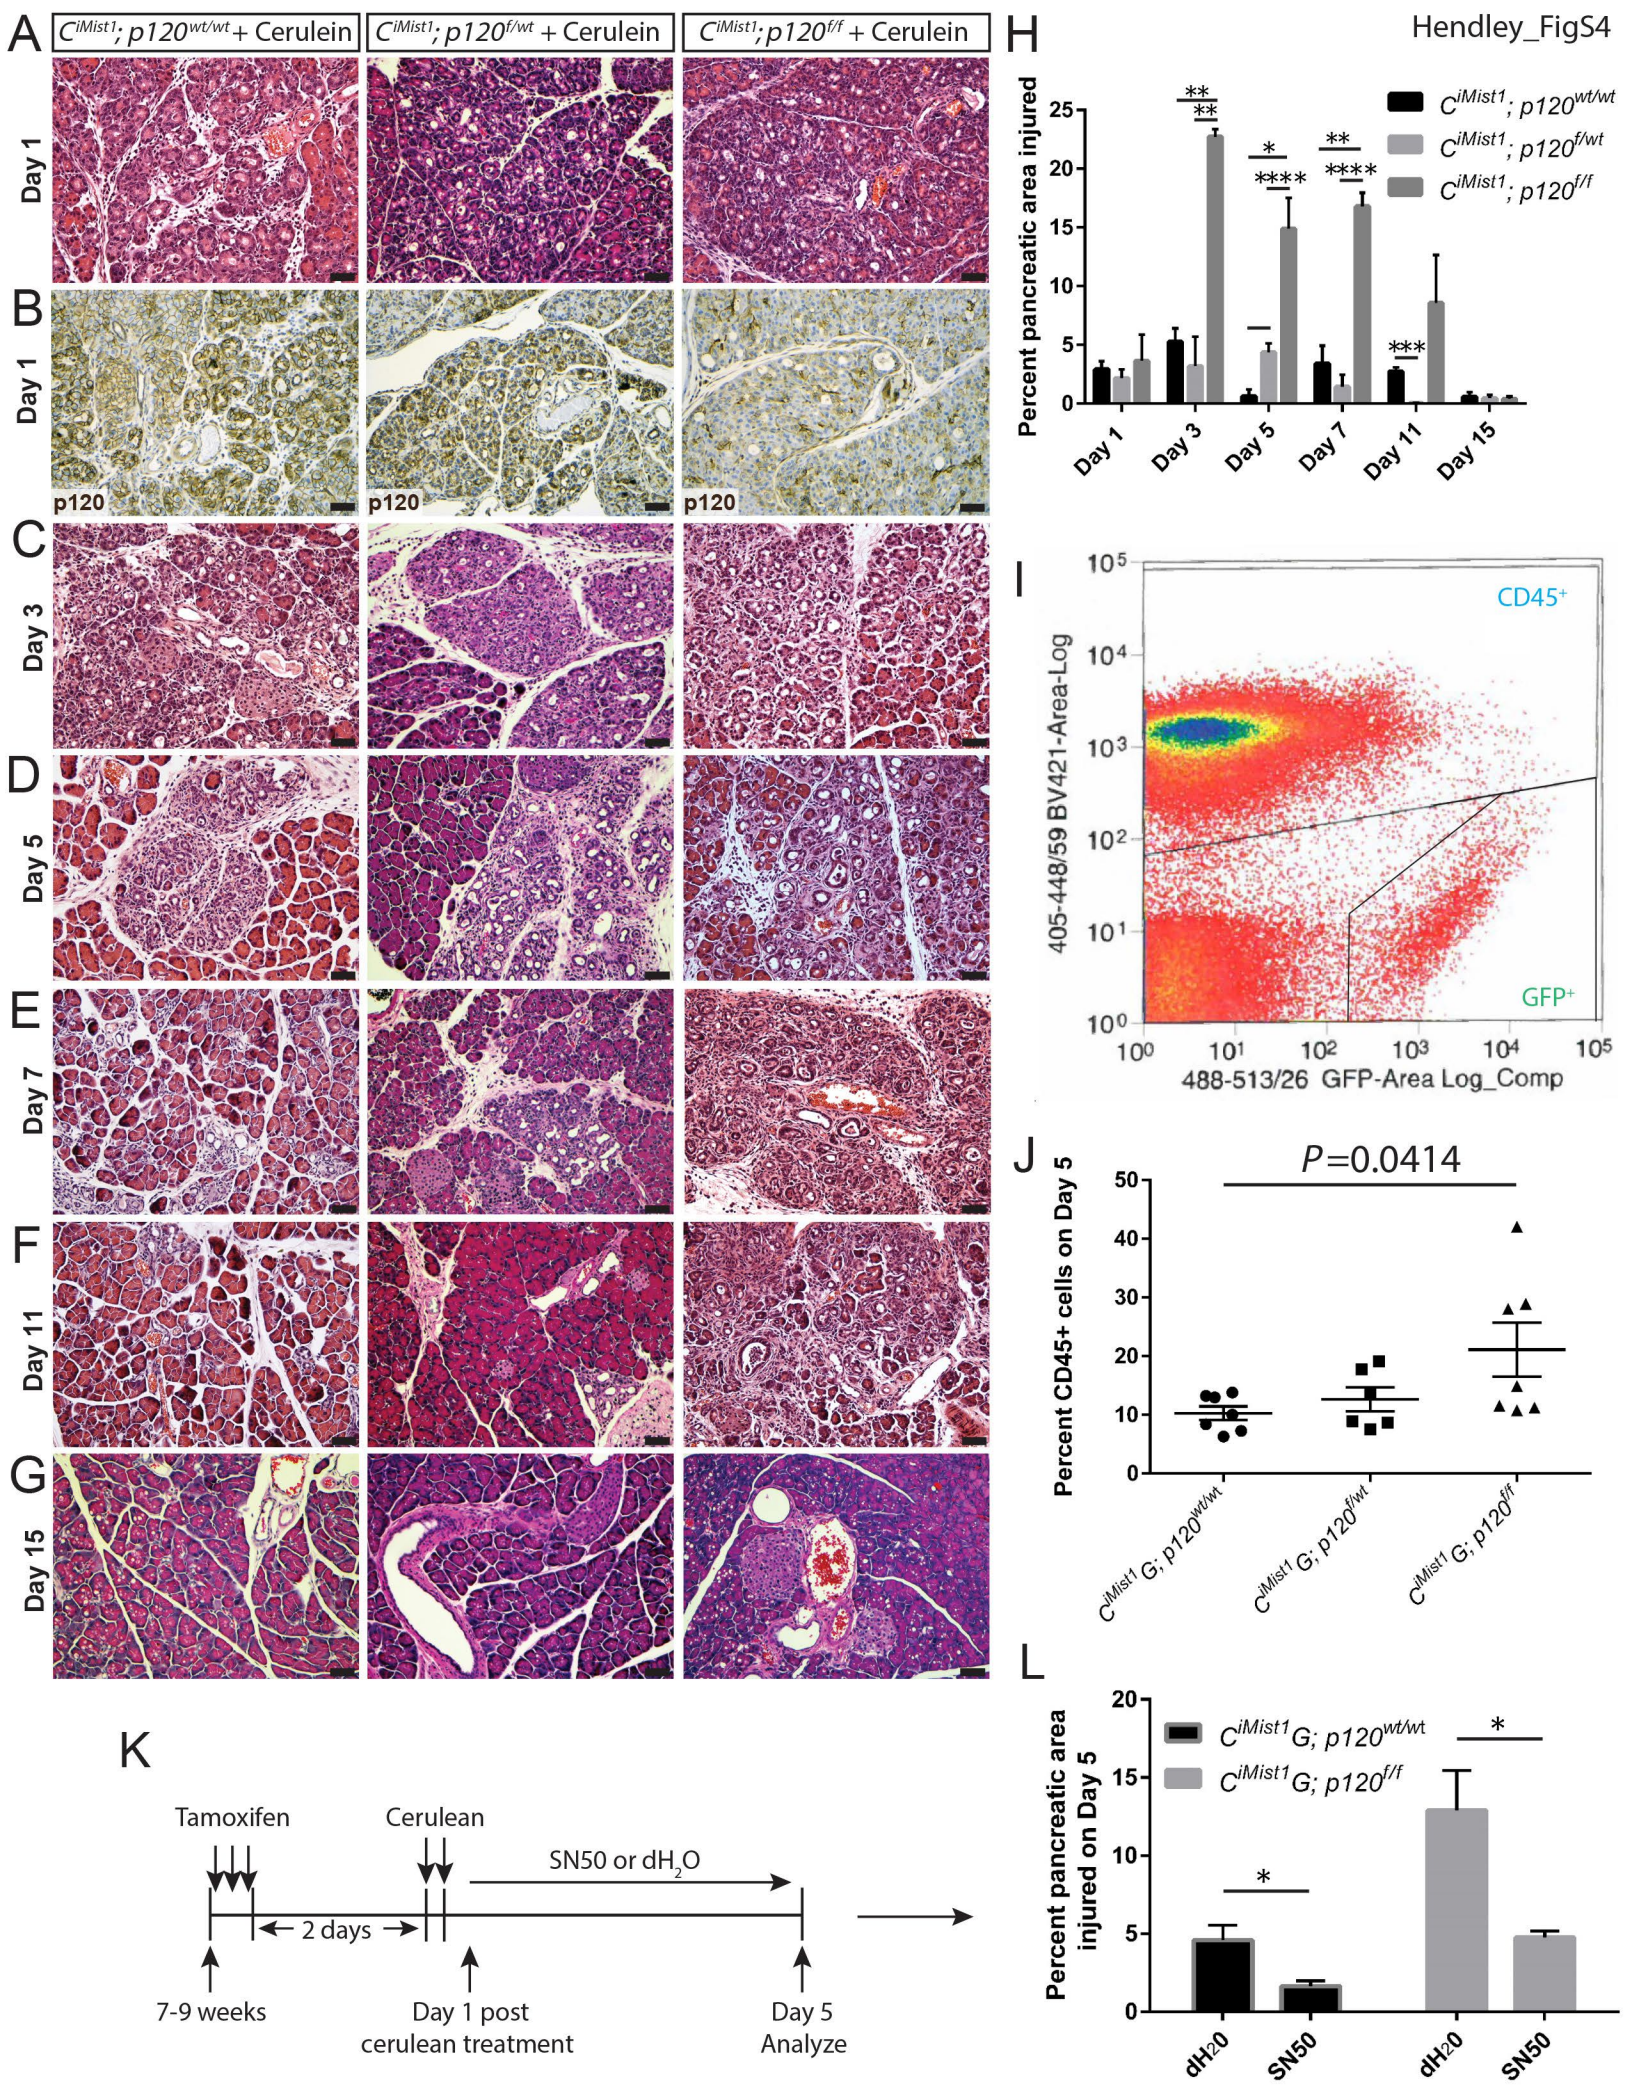



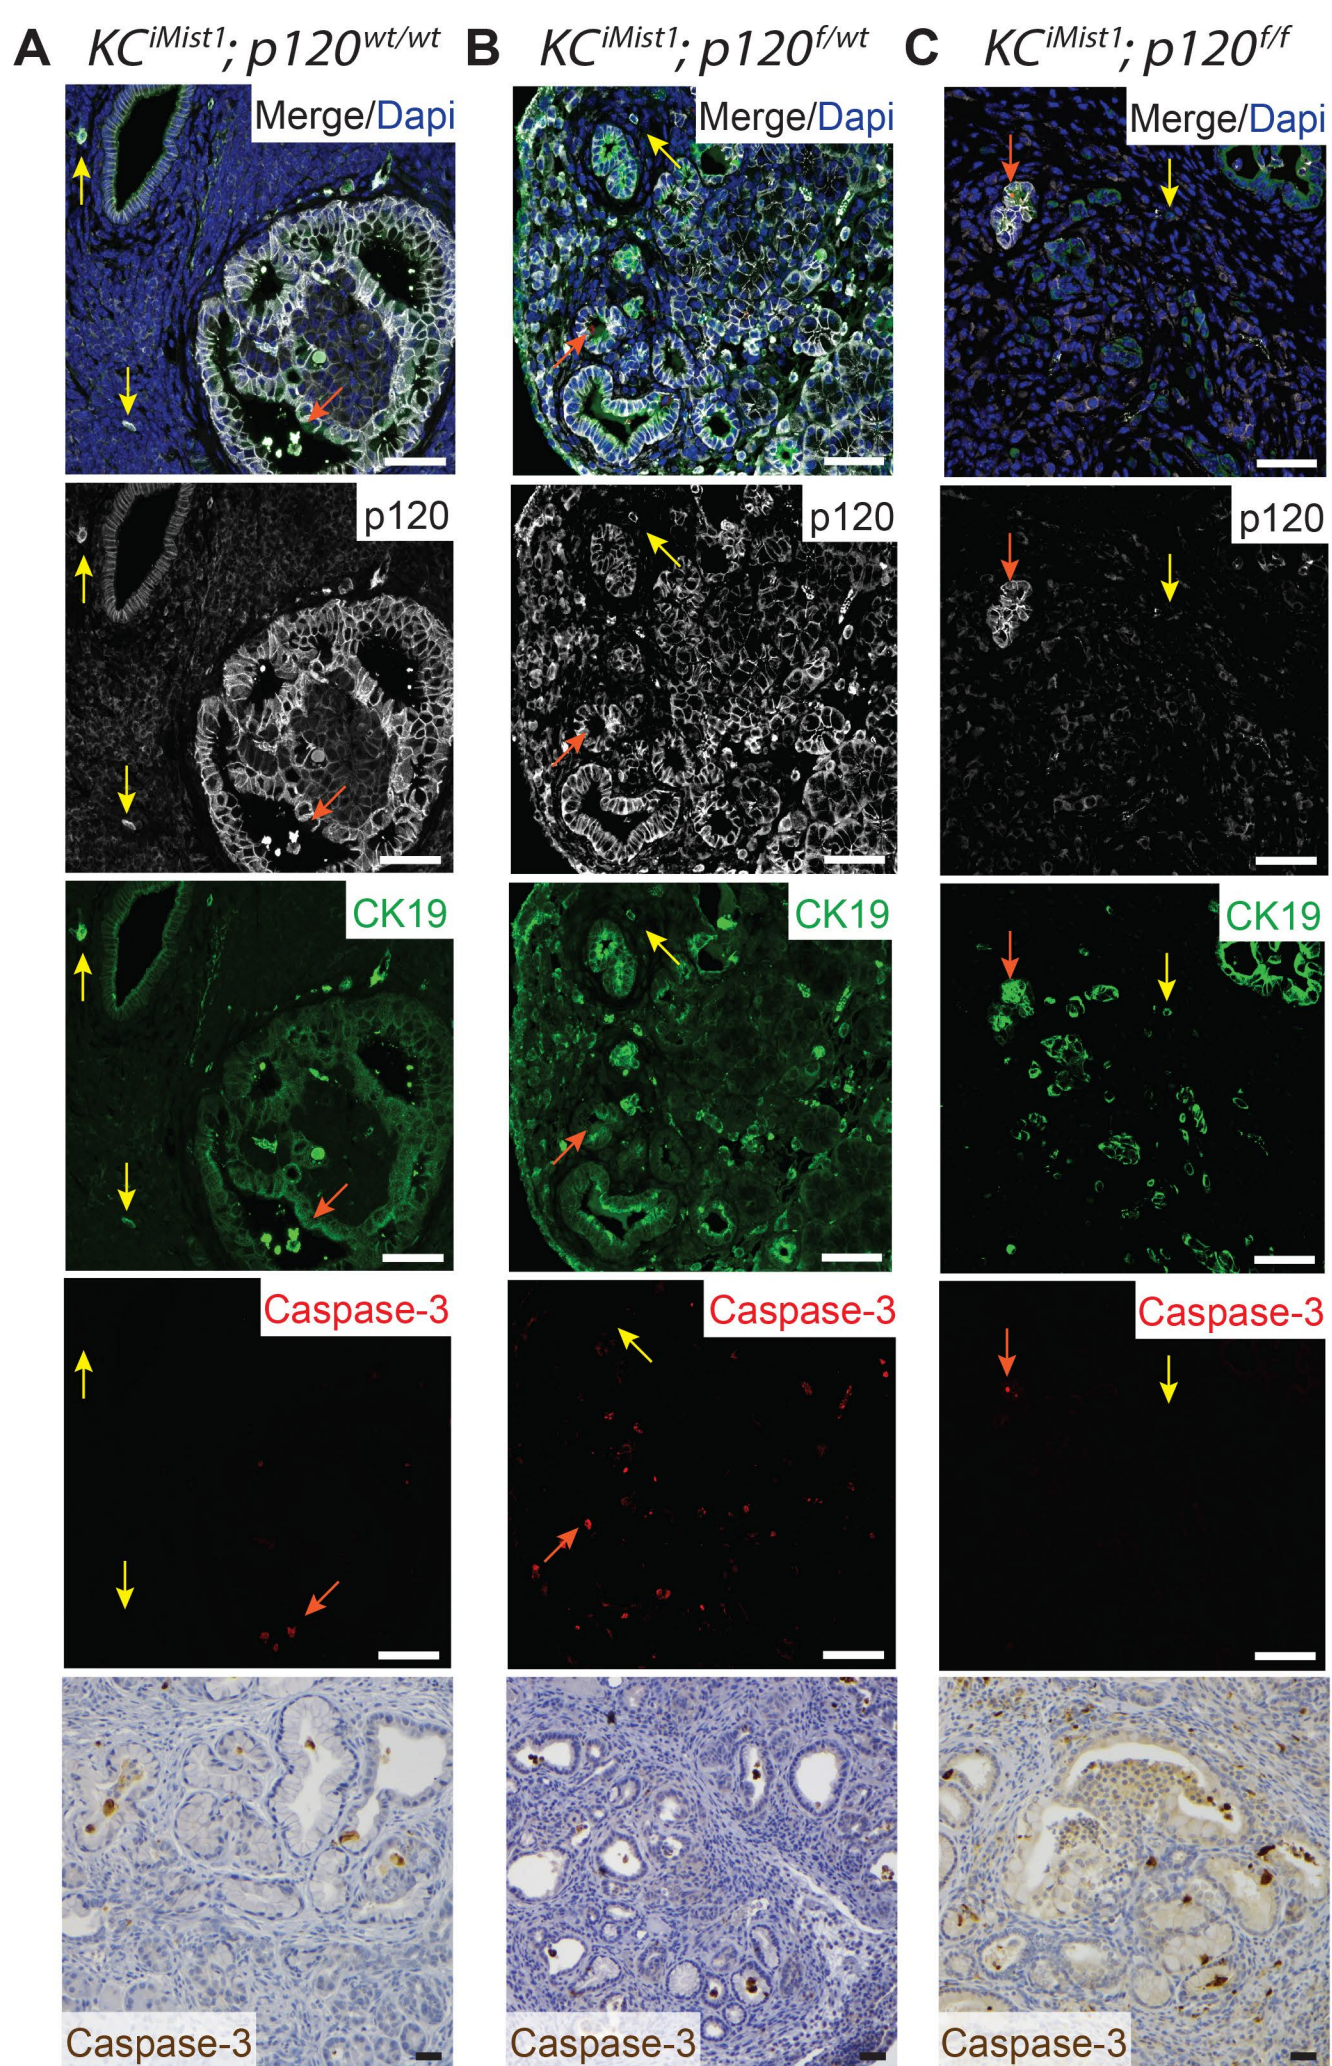



**A**

# Analysis of basally extruded isolated epithelial cells

Hendley\_FigS6

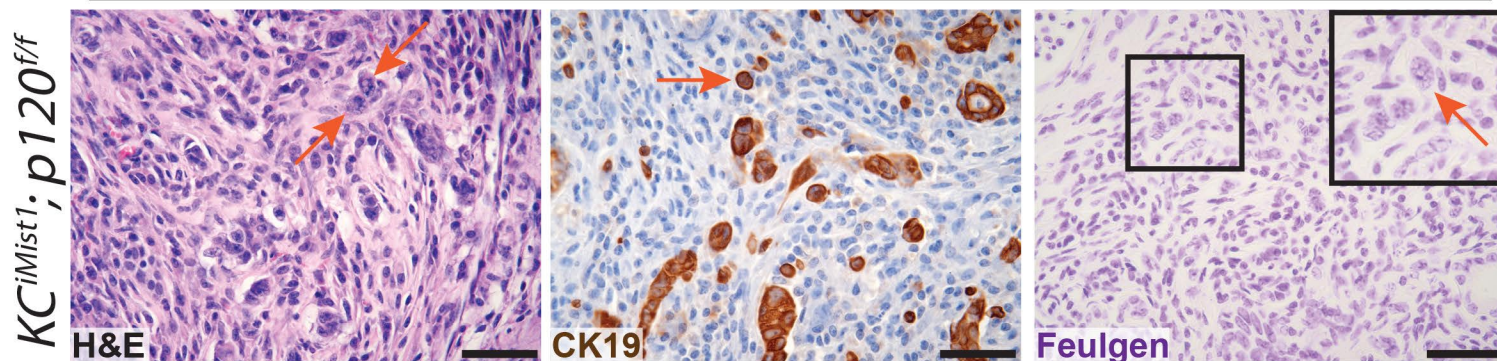**B**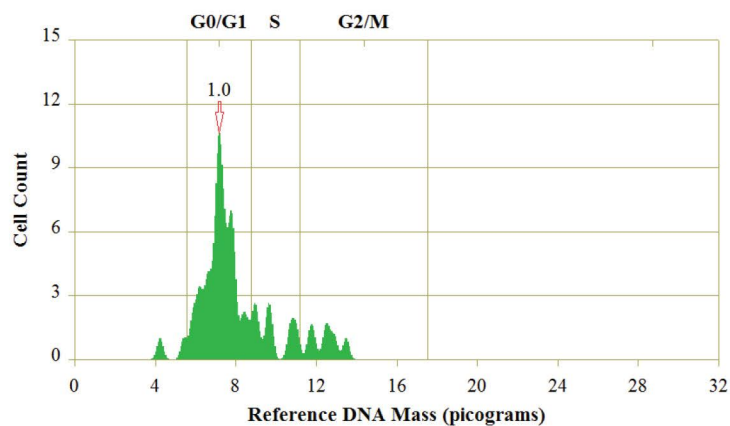**C**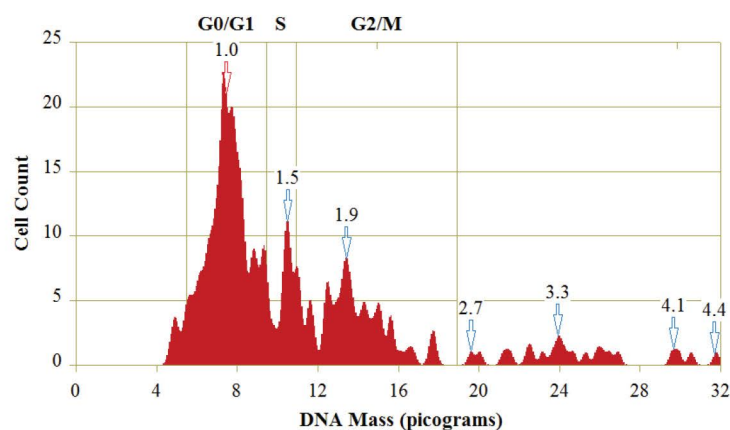**D**

## Invasive pancreatic neoplasia

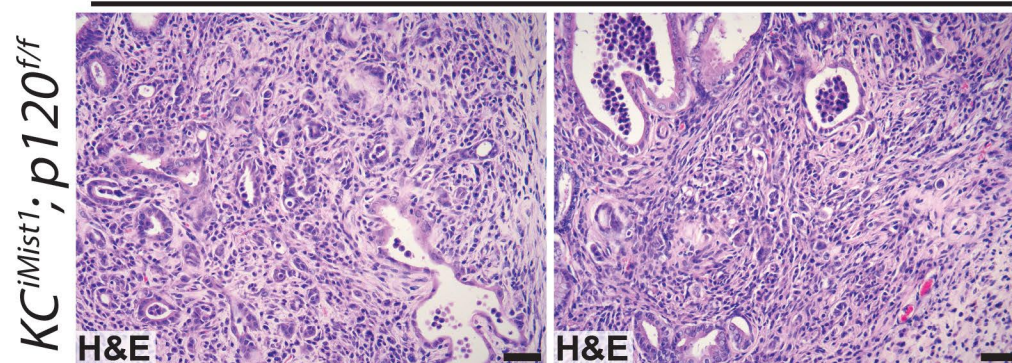



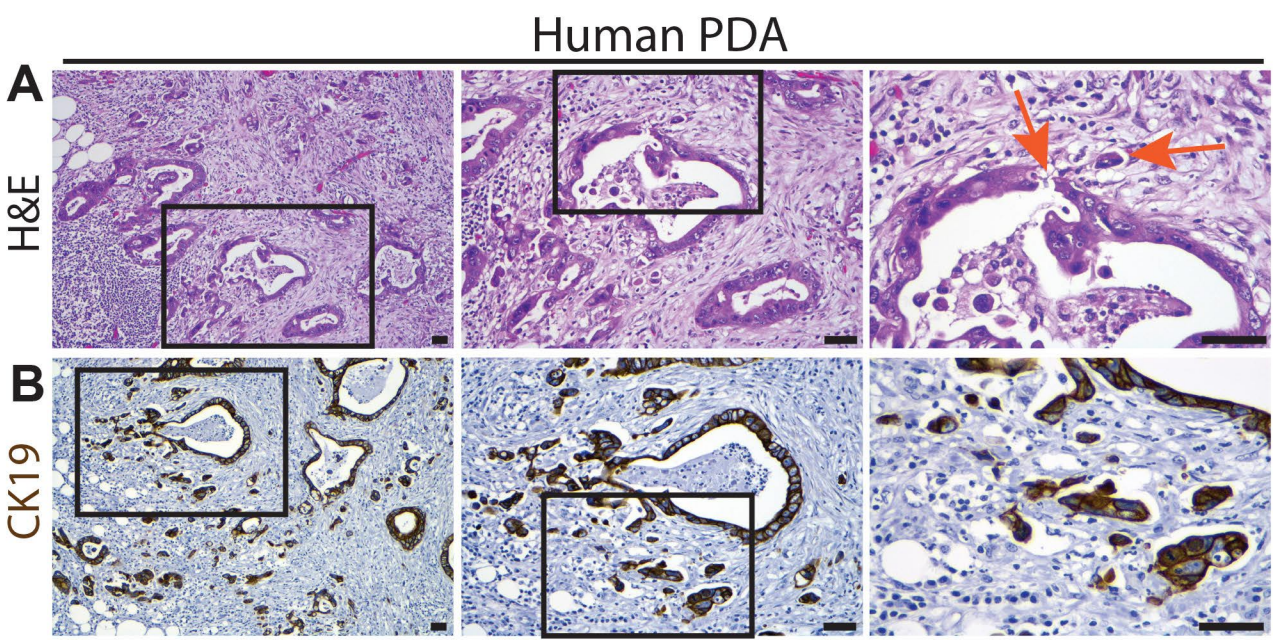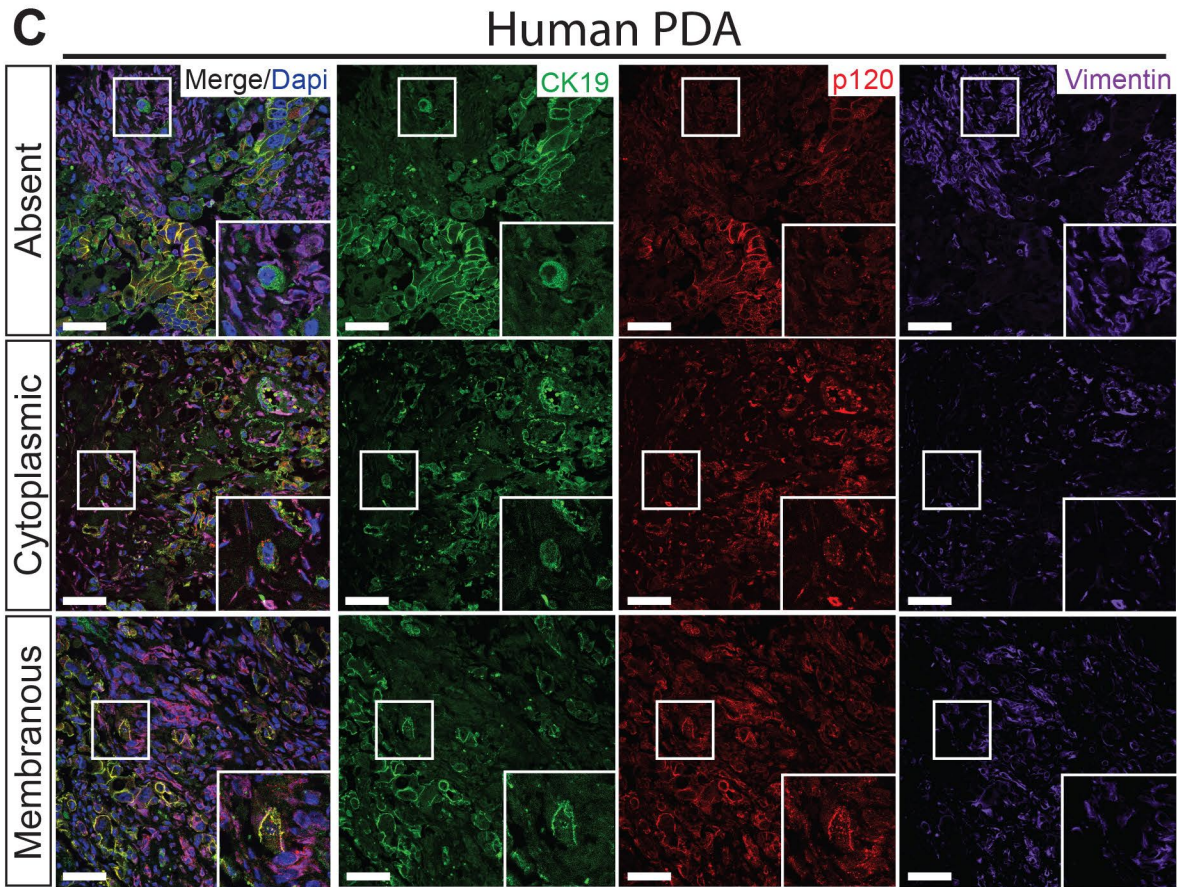

**D** Subcellular localization of p120 in isolated epithelial cells in human PDA

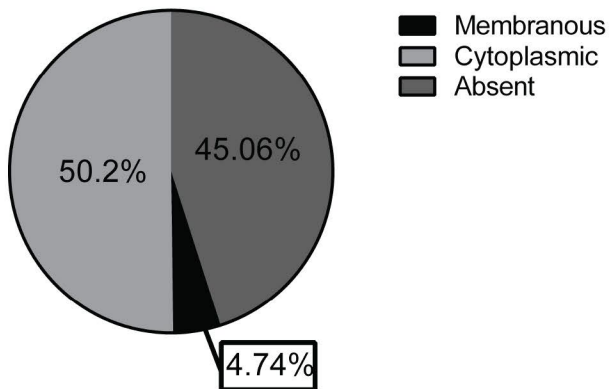



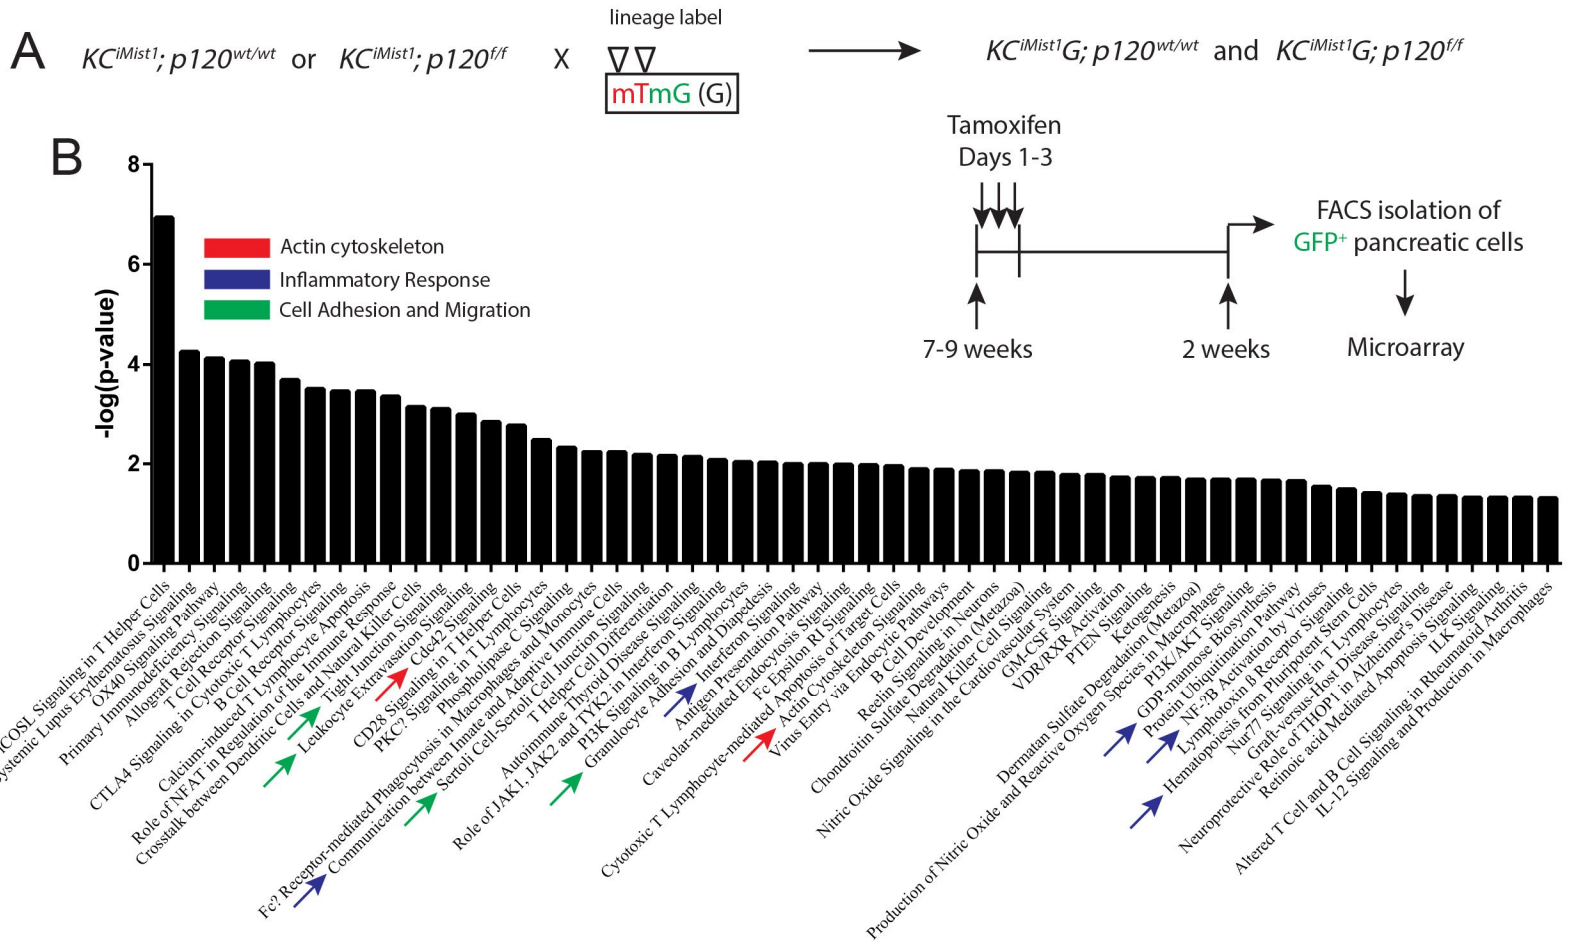

Supplement: 00085472can152268-sup-154174_2_supp_3399418_g3vv8h.pdf [file 00085472can152268-sup-154174_2_supp_3399418_g3vv8h.pdf]
